# Supplementary material
Source: PubMed Central journal article supplement (PMC8336467)
Supplement: NIHMS1725640-supplement-Supplemental_materials.pdf [file NIHMS1725640-supplement-Supplemental_materials.pdf]

## **SUPPLEMENTAL MATERIALS**

### **Contents**

|                                                                                                                                                                                                           |          |
|-----------------------------------------------------------------------------------------------------------------------------------------------------------------------------------------------------------|----------|
| <b>Supplemental Table 1. Participant and maternal baseline characteristics, caregiver-reported adherence measures, and correlates of INH adherence indicated by a positive urine isoniazid result ...</b> | <b>2</b> |
| <b>Development of an in-house urine INH metabolite test .....</b>                                                                                                                                         | <b>3</b> |
| <b>Supplemental Figure. Development of a urine dipstick assay to detect INH metabolites as a biomarker-based adherence measure. ....</b>                                                                  | <b>3</b> |
| <b>Supplemental Table 2. INH dipstick assay results overall and by visit .....</b>                                                                                                                        | <b>4</b> |
| <b>Supplemental Table 3. INH dipstick result and caregiver-reported adherence measures overall and by visit.....</b>                                                                                      | <b>5</b> |
| <b>Supplemental Table 4. INH dipstick assay compared to commercial test .....</b>                                                                                                                         | <b>6</b> |
| <b>Supplemental Table 5. INH dipstick and IsoScreen result and caregiver-reported adherence measures</b>                                                                                                  | <b>6</b> |

**Supplemental Table 1. Participant and maternal baseline characteristics, caregiver-reported adherence measures, and correlates of INH adherence as indicated by a positive urine isoniazid result\***

| Characteristic                                            | Median (IQR) or n (%)<br>N=97 | RR (95% CI)                | p     |
|-----------------------------------------------------------|-------------------------------|----------------------------|-------|
| <b>Infant Characteristics</b>                             |                               |                            |       |
| Infant age (weeks)                                        | 6.3 (6.0-6.4)                 | 1.0 (1.0-1.0) <sup>a</sup> | 0.17  |
| Weight-for-age Z (WAZ) score (at visit)                   | 0.2 (-0.6-0.8)                | 1.3 (1.1-1.6)              | 0.002 |
| Male                                                      | 56 (57.7)                     | 1.0 (0.7-1.5)              | 0.84  |
| Received ARVs for PMTCT                                   | 95 (97.9)                     | 0.5 (0.1-2.1)              | 0.34  |
| Study visit                                               | --                            | 0.9 (0.8-1.0)              | 0.17  |
| Time since enrollment (months)                            | 2.1 (1.2-4.7)                 | 1.0 (0.9-1.0)              | 0.16  |
| <b>Maternal Characteristics on enrollment</b>             |                               |                            |       |
| Maternal age (years)                                      | 26 (24-30)                    | 1.0 (1.0-1.1) <sup>b</sup> | 0.51  |
| Secondary education started                               | 43 (44.3)                     | 1.5 (1.1-2.2)              | 0.02  |
| Maternal CD4 (cells/mm <sup>3</sup> ) <sup>c</sup> (n=83) | 460 (313-646)                 | 1.0 (1.0-1.0)              | 0.34  |
| Maternal HIV RNA (copies/ml) <sup>c</sup> (n=89)          | 0 (0-0)                       | 1.0 (1.0-1.0)              | 0.80  |
| HIV viral load undetectable <sup>d</sup>                  | 68 (76.4)                     | 1.1 (0.7-1.6)              | 0.68  |
| HIV viral load <1000 (copies/ml)                          | 83 (93.3)                     | 2.1 (1.1-4.0)              | 0.02  |
| Maternal ART current use                                  | 97 (100)                      | --                         | --    |
| Maternal ART initiation timing                            |                               |                            |       |
| Before pregnancy                                          | 69 (71.1)                     | 0.9 (0.6-1.4)              | 0.62  |
| During/after pregnancy <sup>e</sup>                       | 28 (28.9)                     | ref                        |       |
| Maternal history of TB                                    | 10 (10.3)                     | 0.8 (0.4-1.3)              | 0.35  |
| Maternal IPT any use                                      | 73 (75.3)                     | 1.3 (0.8-2.1)              | 0.33  |
| Maternal IPT current use                                  | 26 (37.0)                     | 0.7 (0.5-1.1)              | 0.11  |
| Maternal IPT initiation timing                            |                               |                            |       |
| Before pregnancy                                          | 20 (27.4)                     | 0.9 (0.6-1.5)              | 0.72  |
| During pregnancy                                          | 44 (60.3)                     | 0.7 (0.5-1.1)              | 0.12  |
| After pregnancy                                           | 9 (12.3)                      | ref                        |       |
| <b>Residential Characteristics on enrollment</b>          |                               |                            |       |
| Persons in household                                      | 4 (4-4)                       | 1.0 (0.8-1.2)              | 0.93  |
| Rooms in household                                        | 2 (1-3)                       | 1.1 (1.0-1.2)              | 0.13  |
| Flush toilet in home                                      | 11 (11.3)                     | 1.4 (0.9-2.2)              | 0.10  |
| Electricity in home                                       | 65 (67.0)                     | 1.1 (0.7-1.6)              | 0.79  |
| Running water in home                                     | 20 (20.6)                     | 1.1 (0.7-1.9)              | 0.70  |
| <b>Caregiver-reported adherence at visit</b>              |                               |                            |       |
|                                                           | <b>N=155</b>                  |                            |       |
| Median time since last INH dose (hours)                   | 15.1 (5.0-17.1)               | 1.0 (1.0-1.0)              | 0.20  |
| Last INH dose (hours)                                     |                               |                            |       |
| <24                                                       | 134 (86.5)                    | 4.9 (0.8-28.9)             | 0.08  |
| 24-48                                                     | 14 (9.0)                      | 4.3 (0.7-25.4)             | 0.10  |
| >48                                                       | 7 (4.5)                       | ref                        |       |
| Optimal INH use throughout the study <sup>f</sup>         | 93 (60.0)                     | 0.9 (0.6-1.4)              | 0.78  |
| Optimal INH use since last study visit <sup>f</sup>       | 149 (96.1)                    | 3.7 (0.7-20.1)             | 0.13  |
| No missed doses in past 3 days                            | 136 (87.7)                    | 2.4 (1.0-5.6)              | 0.05  |

<sup>a</sup> Age at study visit (per each additional week)

<sup>b</sup> Age (per each additional year)

<sup>c</sup> CD4 and VL data collected from routine programmatic data

<sup>d</sup> HIV viral load < 20 copies/ml

<sup>e</sup> Includes 1 mother who initiated ART after delivery but before study enrollment

<sup>f</sup> ≥ 90% reported adherence

\*Infant, maternal, and residential characteristics are from baseline with exception of weight-for-age (WAZ) score, study visit, and time since enrollment which is from the visit that urine testing occurred. Caregiver-reported adherence is from the visit that urine testing occurred.

## Development of an in-house urine INH metabolite test

To detect urine INH metabolites in urine, a modified Arkansas method was used to detect a color change produced when the INH metabolite isonicotinic acid reacts with cyanogen chloride and barbituric acid impregnated into the dipstick (**Supplemental Figure**). The INH metabolite is typically detectable in urine within 24-30 hours of ingestion.

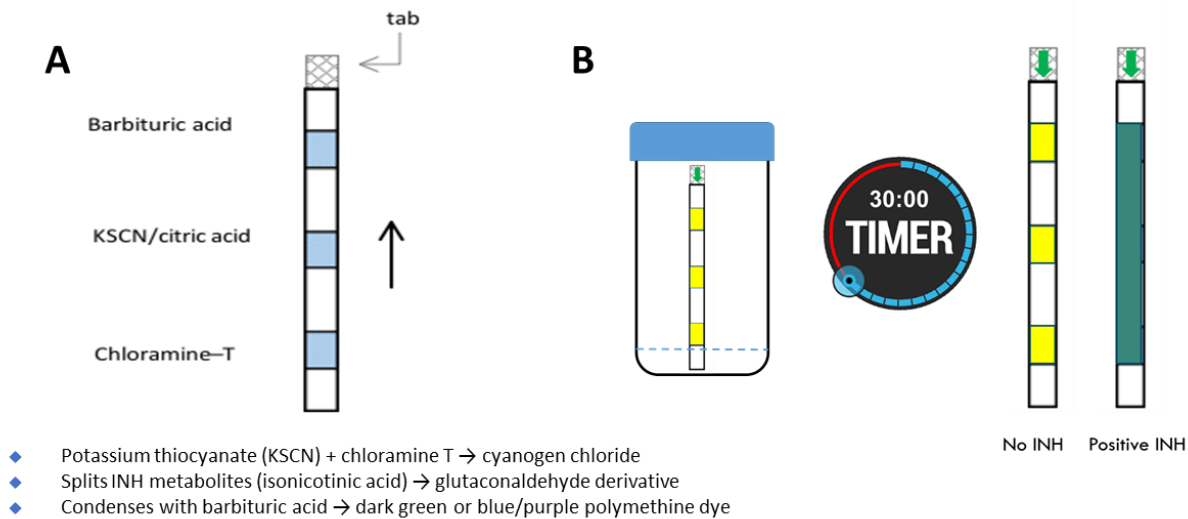

**Supplemental Figure. Development of a urine dipstick assay to detect INH metabolites as a biomarker-based adherence measure.** *Panel A:* Development of urine dipstick assay using a modified Arkansas method to detect the INH metabolite isonicotinic acid. By reversing the order of reagents, a lower concentration of reagents was required. *Panel B:* The INH dipstick is placed so that the bottom edge of the dipstick is in contact with the urine, allowing the urine to wick up the dipstick and then reviewed for color change at 30 minutes. A positive test is defined as a color change of green or blue/purple.

Deposition of chemical reagents was facilitated by the dispense platform equipped with FrontLine dispensers (BioDot ZX1010). Cotton fiber membranes (Ahlstrom In Vitro Diagnostic Cotton Fiber Grade 222) were cut into 60 mm x 200 mm strips and fixed onto PVC backing cards (Diagnostic Consulting Network MIBA-020). The reagents, barbituric acid (1.5% w/v (g/mL), pH 5.2, Sigma Aldrich 185698); chloramine-T trihydrate (15% w/v, Sigma Aldrich 402869); and a solution of potassium thiocyanate (60% w/v, Sigma Aldrich P3011) with citric acid monohydrate (8% w/v, Sigma Aldrich C1909); were solubilized in filtered deionized water. Then using the striper, reagents were dispensed onto the assembled cards until each 4 mm wide section of the card contained the following amount of each reagent as shown in **Supplemental Figure, Panel A**; barbituric acid: 1.80 mg; chloramine-T trihydrate: 2.52 mg; potassium thiocyanate: 1.08 mg. It should be noted that in order to prevent the reagents from blending together, the cards were dried for 5 minutes in an oven at 55 °C. Once the cards were completed and dried, they were stored in a desiccator box until they were ready to be cut into strips. The final 4 mm wide strips were cut using a guillotine strip cutter (Kinbio ZQ2002).

To verify the performance of these strips, we evaluated these strips using mock INH metabolite solutions of isonicotinic acid (Sigma Aldrich I17508) at 1, 5, 10, 25, 50, and 100 µg/mL. 0.5 mL of each sample was added to its respective culture tube (10 mm x 75 mm) before a test strip was placed in the tube. The target limit of detection was 5 µg/mL, was chosen to match the limit of detection reported by Becton Dickinson for their discontinued commercial INH detection strip BD-Taxo™ - INH Test Strips (10-231743). The strips that performed as expected were stored in sealed mylar bags with desiccant packets until used.

**Supplemental Table 2. INH dipstick assay results overall and by visit**

| <b>INH dipstick color change</b> | <b>Total<br/>N=155<br/>n (%)</b> | <b>Visit 2<br/>10 weeks of<br/>age<br/>N=48<br/>n (%)</b> | <b>Visit 3<br/>3 months of<br/>age<br/>N=49<br/>n (%)</b> | <b>Visit 4<br/>6 months of<br/>age<br/>N=25<br/>n (%)</b> | <b>Visit 5<br/>9 months of<br/>age<br/>N=14<br/>n (%)</b> | <b>Visit 6<br/>12 months of<br/>age<br/>N=9<br/>n (%)</b> | <b>Visit 7<br/>12 months post<br/>enrollment<br/>N=10<br/>n (%)</b> |
|----------------------------------|----------------------------------|-----------------------------------------------------------|-----------------------------------------------------------|-----------------------------------------------------------|-----------------------------------------------------------|-----------------------------------------------------------|---------------------------------------------------------------------|
| Yes                              | 77 (49.7)                        | 29 (60.4)                                                 | 26 (53.1)                                                 | 12 (48.0)                                                 | 1 (7.1)                                                   | 3 (33.3)                                                  | 6 (60.0)                                                            |
| No                               | 78 (50.3)                        | 19 (39.6)                                                 | 23 (46.9)                                                 | 13 (52.0)                                                 | 13 (92.9)                                                 | 6 (66.7)                                                  | 4 (40.0)                                                            |

**Supplemental Table 3. INH dipstick result and caregiver-reported adherence measures overall and by visit**

| Caregiver-reported timing of last INH use (hours)     |                         |                    |                                             |                                             |                                             |                    |                                             |                   |                                             |                                             |                                             |                   |                                                       |                   |             |                                             |              |            |                                                       |              |            |
|-------------------------------------------------------|-------------------------|--------------------|---------------------------------------------|---------------------------------------------|---------------------------------------------|--------------------|---------------------------------------------|-------------------|---------------------------------------------|---------------------------------------------|---------------------------------------------|-------------------|-------------------------------------------------------|-------------------|-------------|---------------------------------------------|--------------|------------|-------------------------------------------------------|--------------|------------|
| INH dipstick color change                             | Total<br>N=155<br>n (%) |                    |                                             | Visit 2<br>10 weeks of age<br>N=48<br>n (%) |                                             |                    | Visit 3<br>3 months of age<br>N=49<br>n (%) |                   |                                             | Visit 4<br>6 months of age<br>N=25<br>n (%) |                                             |                   | Visit 5<br>9 months of age<br>N=14<br>n (%)           |                   |             | Visit 6<br>12 months of age<br>N=9<br>n (%) |              |            | Visit 7<br>12 months post enrollment<br>N=10<br>n (%) |              |            |
|                                                       | <24<br>n=134            | 24-48<br>n=14      | >48<br>n=7                                  | <24<br>n=44                                 | 24-48<br>n=3                                | >48<br>n=1         | <24<br>n=42                                 | 24-48<br>n=4      | >48<br>n=3                                  | <24<br>n=22                                 | 24-48<br>n=3                                | >48<br>n=0        | <24<br>n=9                                            | 24-48<br>n=3      | >48<br>n=2  | <24<br>n=8                                  | 24-48<br>n=0 | >48<br>n=1 | <24<br>n=9                                            | 24-48<br>n=1 | >48<br>n=0 |
| Yes                                                   | 69<br>(51.5)            | 7<br>(50.0)        | 1<br>(14.3)                                 | 26<br>(59.1)                                | 3<br>(100)                                  | 0<br>(0)           | 24<br>(57.1)                                | 1<br>(25.0)       | 1<br>(33.3)                                 | 10<br>(42.5)                                | 2<br>(66.7)                                 | 0<br>(0)          | 1<br>(11.1)                                           | 0<br>(0)          | 0<br>(0)    | 3<br>(37.5)                                 | 0<br>(0)     | 0<br>(0)   | 5<br>(55.6)                                           | 1<br>(100)   | 0<br>(0)   |
| No                                                    | 65<br>(48.5)            | 7<br>(50.0)        | 6<br>(85.7)                                 | 18<br>(40.9)                                | 0<br>(0)                                    | 1<br>(100)         | 18<br>(42.8)                                | 3<br>(75.0)       | 2<br>(66.7)                                 | 12<br>(54.6)                                | 1<br>(33.3)                                 | 0<br>(0)          | 8<br>(88.9)                                           | 3<br>(100)        | 12<br>(100) | 5<br>(62.5)                                 | 0<br>(0)     | 1<br>(100) | 4<br>(44.4)                                           | 0<br>(0)     | 0<br>(0)   |
| Caregiver-reported missed dose in past 3 days         |                         |                    |                                             |                                             |                                             |                    |                                             |                   |                                             |                                             |                                             |                   |                                                       |                   |             |                                             |              |            |                                                       |              |            |
| INH dipstick color change                             | Total<br>N=155<br>n (%) |                    | Visit 2<br>10 weeks of age<br>N=48<br>n (%) |                                             | Visit 3<br>3 months of age<br>N=49<br>n (%) |                    | Visit 4<br>6 months of age<br>N=25<br>n (%) |                   | Visit 5<br>9 months of age<br>N=14<br>n (%) |                                             | Visit 6<br>12 months of age<br>N=9<br>n (%) |                   | Visit 7<br>12 months post enrollment<br>N=10<br>n (%) |                   |             |                                             |              |            |                                                       |              |            |
|                                                       | No<br>n=136             | Yes<br>n=19        | No<br>n=46                                  | Yes<br>n=2                                  | No<br>n=46                                  | Yes<br>n=3         | No<br>n=21                                  | Yes<br>n=4        | No<br>n=5                                   | Yes<br>n=9                                  | No<br>n=8                                   | Yes<br>n=1        | No<br>n=                                              | Yes<br>n=0        |             |                                             |              |            |                                                       |              |            |
| Yes                                                   | 72 (52.9)               | 5 (26.3)           | 28 (60.8)                                   | 1 (50.0)                                    | 25 (54.4)                                   | 1 (33.3)           | 9 (42.9)                                    | 3 (75.0)          | 1 (20.0)                                    | 0 (0)                                       | 3 (37.5)                                    | 0 (0)             | 6 (60.0)                                              | 0 (0)             |             |                                             |              |            |                                                       |              |            |
| No                                                    | 64 (47.1)               | 14 (73.7)          | 18 (39.1)                                   | 1 (50.0)                                    | 21 (45.7)                                   | 2 (66.7)           | 12 (57.1)                                   | 1 (25.0)          | 4 (80.0)                                    | 9 (100)                                     | 5 (62.5)                                    | 1 (100)           | 4 (40.0)                                              | 0 (0)             |             |                                             |              |            |                                                       |              |            |
| Caregiver-reported optimal INH use since last visit * |                         |                    |                                             |                                             |                                             |                    |                                             |                   |                                             |                                             |                                             |                   |                                                       |                   |             |                                             |              |            |                                                       |              |            |
| INH dipstick color change                             | Total<br>N=155<br>n (%) |                    | Visit 2<br>10 weeks of age<br>N=48<br>n (%) |                                             | Visit 3<br>3 months of age<br>N=49<br>n (%) |                    | Visit 4<br>6 months of age<br>N=25<br>n (%) |                   | Visit 5<br>9 months of age<br>N=14<br>n (%) |                                             | Visit 6<br>12 months of age<br>N=9<br>n (%) |                   | Visit 7<br>12 months post enrollment<br>N=10<br>n (%) |                   |             |                                             |              |            |                                                       |              |            |
|                                                       | Optimal<br>n=149        | Suboptimal<br>n=6  | Optimal<br>n=47                             | Suboptimal<br>n=1                           | Optimal<br>n=46                             | Suboptimal<br>n=3  | Optimal<br>n=25                             | Suboptimal<br>n=0 | Optimal<br>n=13                             | Suboptimal<br>n=1                           | Optimal<br>n=8                              | Suboptimal<br>n=1 | Optimal<br>n=10                                       | Suboptimal<br>n=0 |             |                                             |              |            |                                                       |              |            |
| Yes                                                   | 76 (51.0)               | 1 (16.7)           | 29 (61.7)                                   | 0 (0)                                       | 25 (54.4)                                   | 1 (33.3)           | 12 (48.0)                                   | 0 (0)             | 1 (7.7)                                     | 0 (0)                                       | 3 (37.5)                                    | 0 (0)             | 6 (60.0)                                              | 0 (0)             |             |                                             |              |            |                                                       |              |            |
| No                                                    | 73 (49.0)               | 5 (83.3)           | 18 (38.3)                                   | 1 (100)                                     | 21 (45.7)                                   | 2 (66.7)           | 13 (52.0)                                   | 0 (0)             | 12 (92.3)                                   | 1 (100)                                     | 5 (62.5)                                    | 1 (100)           | 4 (40.0)                                              | 0 (0)             |             |                                             |              |            |                                                       |              |            |
| Caregiver-reported optimal INH use throughout study*  |                         |                    |                                             |                                             |                                             |                    |                                             |                   |                                             |                                             |                                             |                   |                                                       |                   |             |                                             |              |            |                                                       |              |            |
| INH dipstick color change                             | Total<br>N=155<br>n (%) |                    | Visit 2<br>10 weeks of age<br>N=48<br>n (%) |                                             | Visit 3<br>3 months of age<br>N=49<br>n (%) |                    | Visit 4<br>6 months of age<br>N=25<br>n (%) |                   | Visit 5<br>9 months of age<br>N=14<br>n (%) |                                             | Visit 6<br>12 months of age<br>N=9<br>n (%) |                   | Visit 7<br>12 months post enrollment<br>N=10<br>n (%) |                   |             |                                             |              |            |                                                       |              |            |
|                                                       | Optimal<br>n=93         | Suboptimal<br>n=62 | Optimal<br>n=30                             | Suboptimal<br>n=18                          | Optimal<br>n=27                             | Suboptimal<br>n=22 | Optimal<br>n=17                             | Suboptimal<br>n=8 | Optimal<br>n=8                              | Suboptimal<br>n=6                           | Optimal<br>n=5                              | Suboptimal<br>n=4 | Optimal<br>n=6                                        | Suboptimal<br>n=4 |             |                                             |              |            |                                                       |              |            |
| Yes                                                   | 47 (50.5)               | 30 (48.4)          | 19 (63.3)                                   | 10 (55.6)                                   | 16 (59.3)                                   | 10 (45.5)          | 7 (41.2)                                    | 5 (62.5)          | 0 (0)                                       | 1 (16.7)                                    | 2 (40.0)                                    | 1 (25.0)          | 3 (50.0)                                              | 3 (75.0)          |             |                                             |              |            |                                                       |              |            |
| No                                                    | 46 (49.5)               | 32 (51.6)          | 11 (36.7)                                   | 8 (44.4)                                    | 11 (40.7)                                   | 12 (54.6)          | 10 (58.8)                                   | 3 (37.5)          | 8 (100)                                     | 5 (83.3)                                    | 3 (60.0)                                    | 3 (75.0)          | 3 (50.0)                                              | 1 (25.0)          |             |                                             |              |            |                                                       |              |            |

\*≥ 90% reported adherence

**Supplemental Table 4. INH dipstick assay compared to commercial test**

|                     |       | IsoScreen<br>N=15   |                   |
|---------------------|-------|---------------------|-------------------|
|                     |       | Positive<br>n (%)   | Negative<br>n (%) |
| <b>INH dipstick</b> |       |                     |                   |
| Positive            | n (%) | 7 (87.5)            | 1 (14.3)          |
| Negative            | n (%) | 1 (12.5)            | 6 (85.7)          |
| Sensitivity %       |       | 87.5%               |                   |
| Specificity %       |       | 85.7%               |                   |
| Agreement %         |       | 86.7%               |                   |
| Kappa (95% CI)      |       | kappa 0.73, p=0.002 |                   |

**Supplemental Table 5. INH dipstick and IsoScreen result and caregiver-reported adherence measures**

|                     | Total<br>N=15<br>n (%) | Caregiver-reported timing of last<br>INH use (hours)<br>N=15<br>n (%) |              |            | Caregiver-reported missed dose<br>in past 3 days<br>N=15<br>n (%) |            | Caregiver-reported optimal<br>INH use since last visit*<br>N=15<br>n (%) |                   |
|---------------------|------------------------|-----------------------------------------------------------------------|--------------|------------|-------------------------------------------------------------------|------------|--------------------------------------------------------------------------|-------------------|
|                     |                        | <24<br>n=13                                                           | 24-48<br>n=2 | >48<br>n=0 | No<br>n=13                                                        | Yes<br>n=2 | Optimal<br>n=15                                                          | Suboptimal<br>n=0 |
| <b>Color change</b> |                        |                                                                       |              |            |                                                                   |            |                                                                          |                   |
| Yes                 | 7 (46.7)               | 6 (46.2)                                                              | 1 (50.0)     | --         | 7 (53.9)                                                          | 0 (0.0)    | 7 (46.7)                                                                 | --                |
| No                  | 8 (53.3)               | 7 (53.9)                                                              | 1 (50.0)     | --         | 6 (46.2)                                                          | 2 (100.0)  | 8 (53.3)                                                                 | --                |
| <b>IsoScreen</b>    |                        |                                                                       |              |            |                                                                   |            |                                                                          |                   |
| Yes                 | 8 (53.3)               | 7 (53.9)                                                              | 1 (50.0)     | --         | 8 (61.5)                                                          | 0 (0.0)    | 8 (53.3)                                                                 | --                |
| No                  | 7 (46.7)               | 6 (46.2)                                                              | 1 (50.0)     | --         | 5 (38.5)                                                          | 2 (100.0)  | 7 (46.7)                                                                 | --                |

\*≥ 90% reported adherence since last study visit
